# Supplementary material for: Efficacy of T-Cell Receptor-Based Adoptive Cell Therapy in Cutaneous Melanoma: A Meta-Analysis
Source: PubMed Central journal article supplement (PMC10243774; doi:10.1093/oncolo/oyad078), 2023-04-10

|                                        | Phase | Lymphodepletion | IL2 dosage      | Tumor Antigen   | Restriction    | Cell product                     | TCR production                       | Cell delivery |
|----------------------------------------|-------|-----------------|-----------------|-----------------|----------------|----------------------------------|--------------------------------------|---------------|
| <b>Chodon T et al. 2014 [12]</b>       | II    | CF 60 + FLU 25  | HD              | MART1           | HLA A*0201     | Peripheral T cells               | Retroviral transduction              | intravenous   |
| <b>Dréno B et al. 2021 [13]</b>        | I/II  | None            | LD <sub>a</sub> | MART1/MELOE     | HLA A*0201     | Peripheral T cells               | Cocultured with Ag and FACS sorted   | intravenous   |
| <b>Duval L et al. 2015 [18]</b>        | I     | None            | None            | MART1           | HLA A*0201     | T cell line Ccure 709            | Retroviral transduction              | intratumoral  |
| <b>Fontana R et al. 2009 [19]</b>      | I     | None            | None            | MAGE-A3         | HLA A*0201     | Peripheral T cells               | Retroviral transduction              | intravenous   |
| <b>Johnson LA et al. 2009/1 [20]</b>   | II    | CF 60 + FLU 25  | HD              | Cohort 1: MART1 | HLA A*0201     | Peripheral T cells               | Retroviral transduction              | intravenous   |
|                                        |       |                 |                 | Cohort 2: gp100 |                |                                  |                                      |               |
| <b>Khammari A et al. 2009 [21]</b>     | II    | None            | LD <sub>b</sub> | MART1           | HLA A*0201     | Peripheral T cells               | Cocultured with Ag                   | intravenous   |
| <b>Lu YC et al. 2017 [22]</b>          | Ib    | CF 60 + FLU 25  | HD              | MAGE-A3         | HLA DP-B1*0401 | Peripheral T cells/CD4+ fraction | Retroviral transduction              | intravenous   |
| <b>Mackensen A et al. 2006 [23]</b>    | I     | None            | LD <sub>c</sub> | MART1           | HLA A*0201     | Peripheral T cells/CD8+ fraction | Cocultured with Ag-pulsed DC         | intravenous   |
| <b>Mitchell MS et al. 2002 [24]</b>    | I     | None            | None            | Tyrosinase      | HLA A*0201     | Peripheral T cells/CD8+ fraction | Cocultured with mononuclear as APCs  | intravenous   |
| <b>Morgan RA et al. 2006 [25]</b>      | I     | CF 60 + FLU 25  | HD              | MART1           | HLA A*0201     | Peripheral T cells/CD8+ fraction | Retroviral transduction              | intravenous   |
| <b>Morgan 2013 RA et al. 2013 [14]</b> | II    | CF 60 + FLU 25  | HD              | MAGE-A3         | HLA A*0201     | Peripheral T cells/CD8+ fraction | Retroviral transduction              | intravenous   |
| <b>Robbins PF et al. 2011 [16]</b>     | I     | CF 60 + FLU 25  | HD              | NYESO           | HLA A*0201     | Peripheral T cells/CD3+ fraction | Retroviral transduction              | intravenous   |
| <b>Robbins PF et al. 2015 [15]</b>     | II    | CF 60 + FLU 25  | HD              | NYESO           | HLA A*0201     | Peripheral T cells/CD3+ fraction | Retroviral transduction              | intravenous   |
| <b>Yee C et al. 2002/1 [17]</b>        | I     | None            | LD <sub>d</sub> | Cohort 1: MART1 | HLA A*0201     | Peripheral T cells/CD8+ fraction | Cocultured with immunogenic epitopes | intravenous   |
|                                        |       |                 |                 | Cohort 2: gp100 |                |                                  |                                      |               |

**Lymphodepletion:** CF 60 + FLU 25 [Cyclophosphamide 60 mg/kg for 2 days followed by Fludarabine 25 mg/m<sup>2</sup> for 5 days]; **IL2 dosage:** HD [720.000 IU/KG q8h to tolerance]; LD [any IL2 dose below that for HD]: a) IL2 s.c. delivered at 6MU from D1-5; b) IL2 s.c. delivered 9MUx3 D1-5 and D8-12 together with s.c. IFN at 9MUx3 during 4 weeks ; c) IL2 s.c. delivered 3MU for 6 days; d) IL2 s.c. delivered at increasing dosage 0,25/0,5/1MU/m<sup>2</sup> q12h for 14 days ; **Ag:** Antigen; **DC:** Dendritic Cell; **APC:** Antigen Presenting Cell

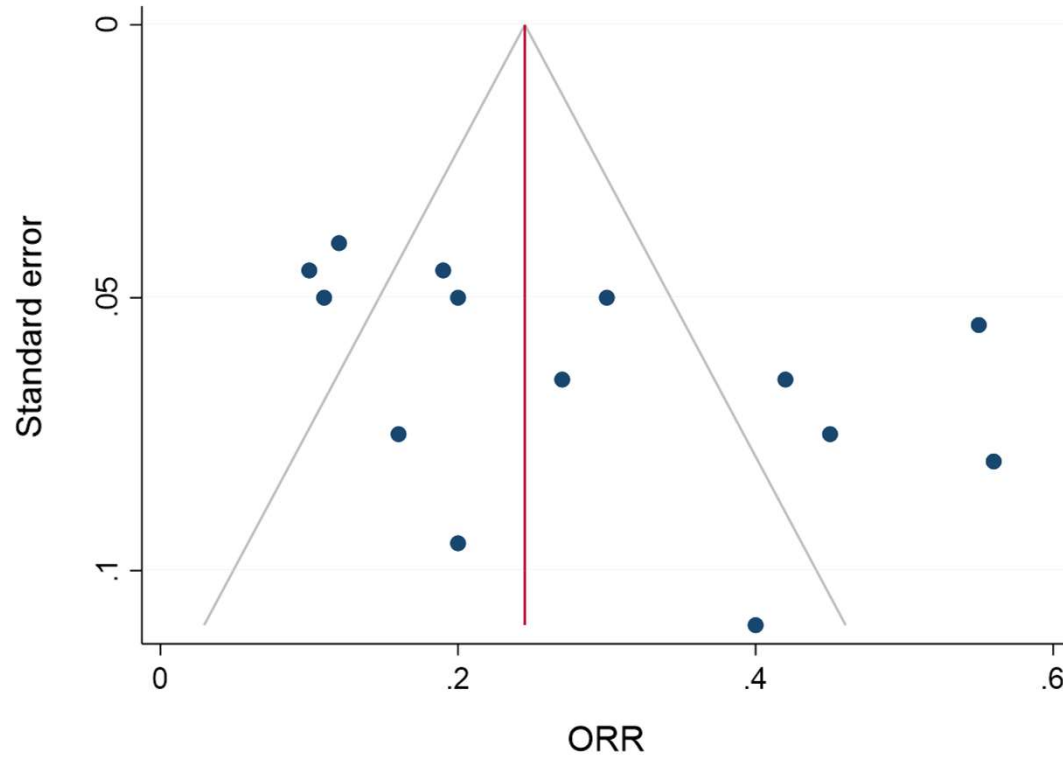

*Egger's test  $p = 0,12$*

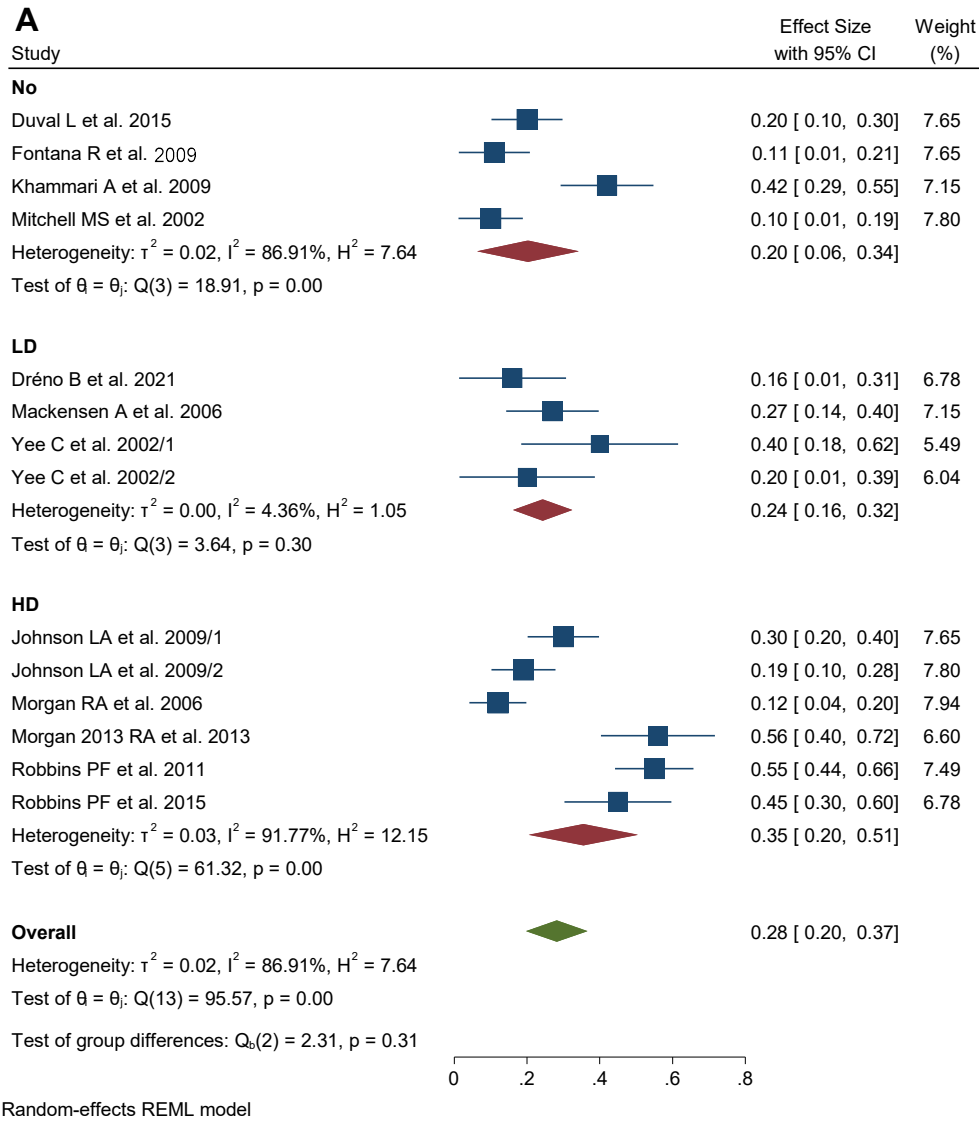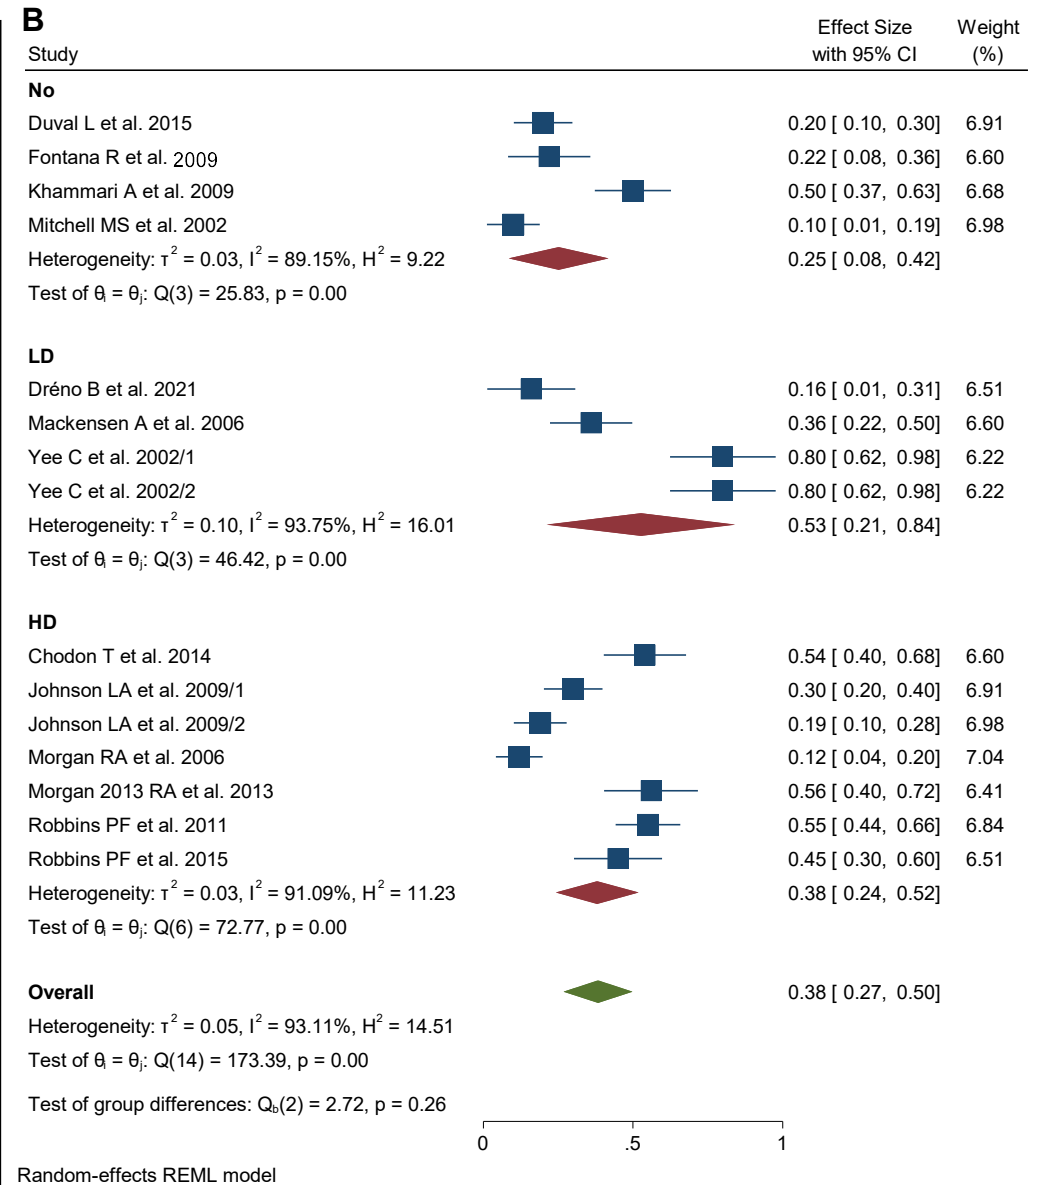

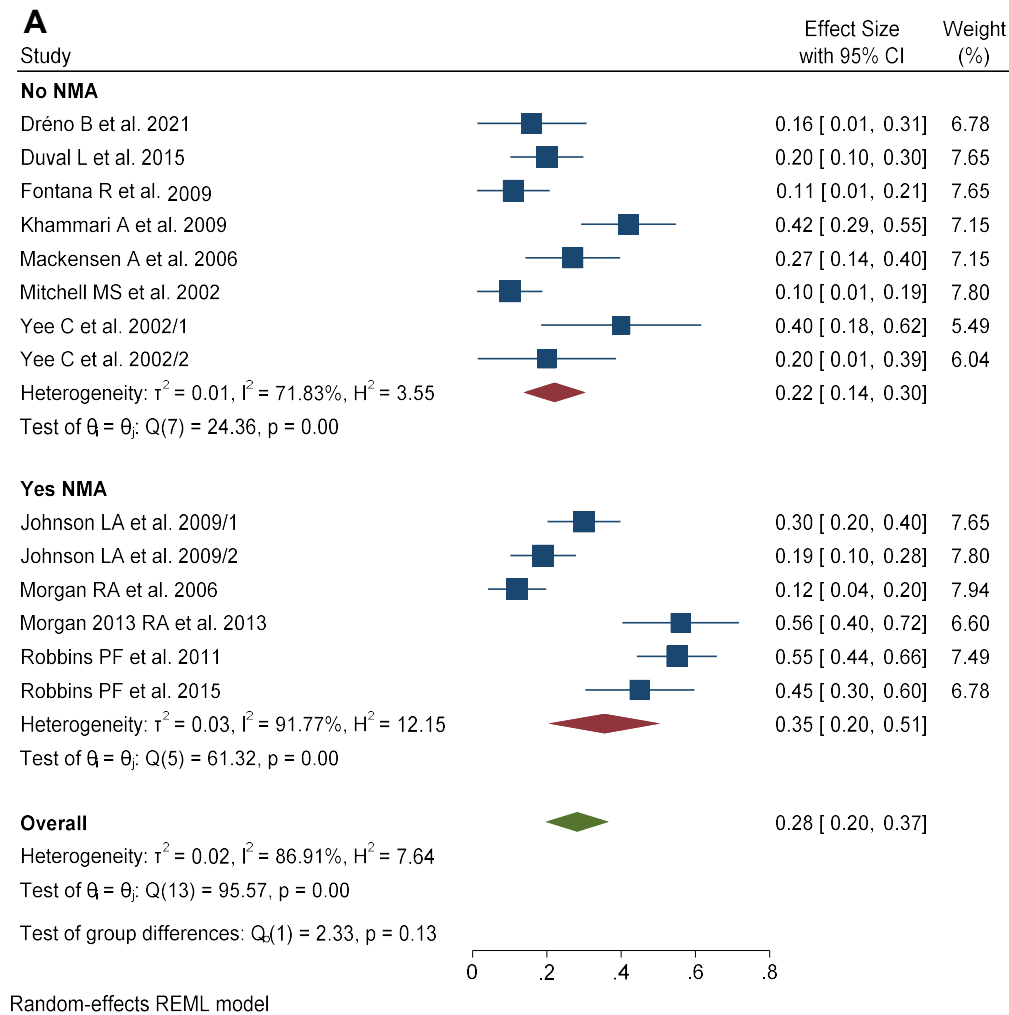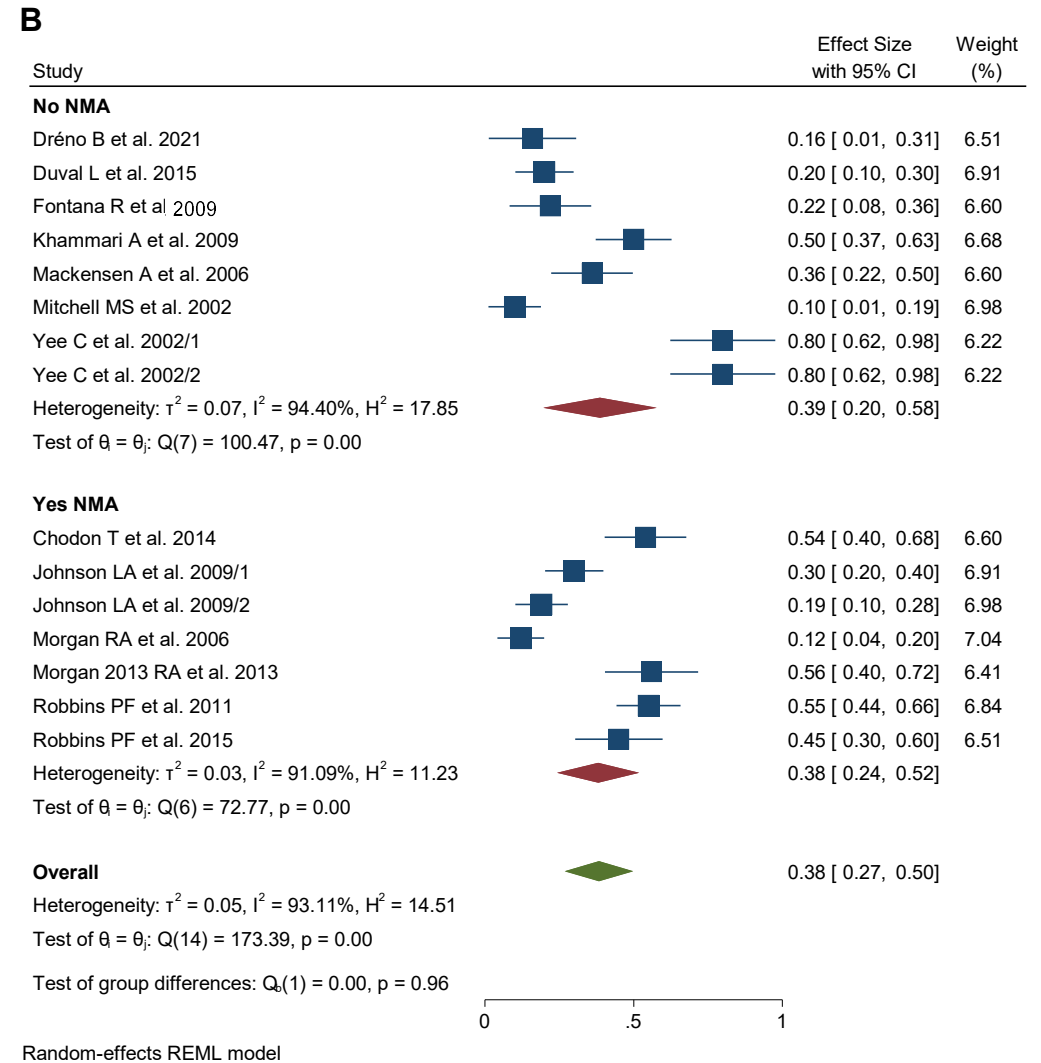

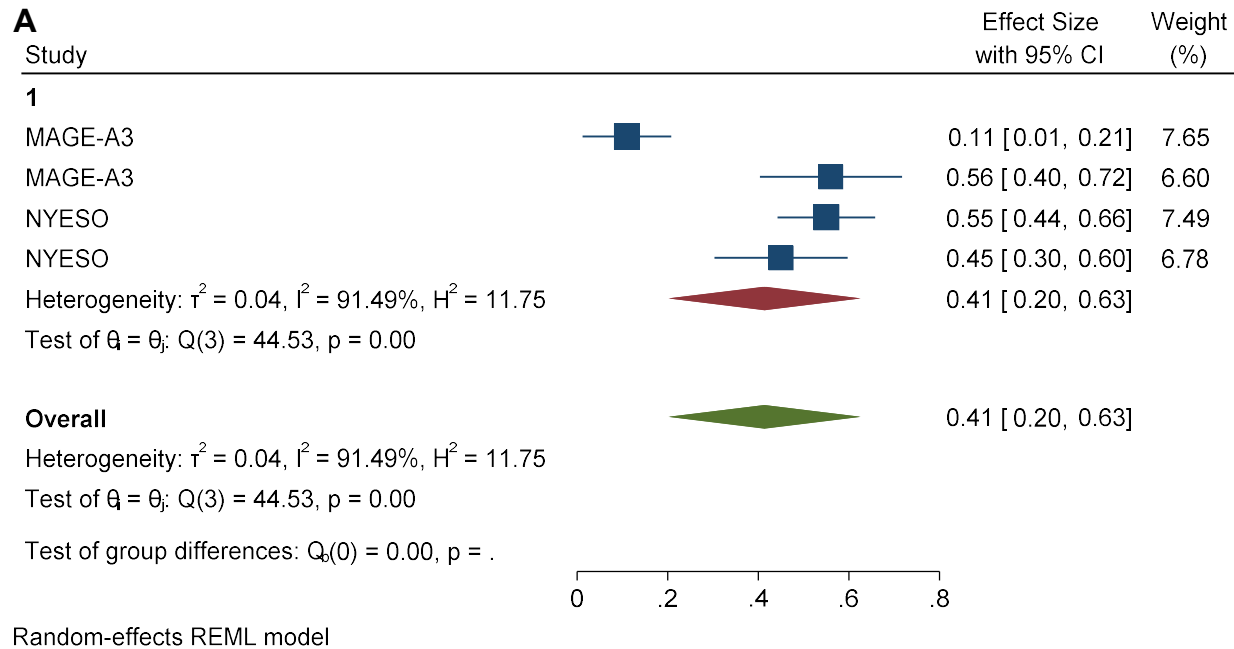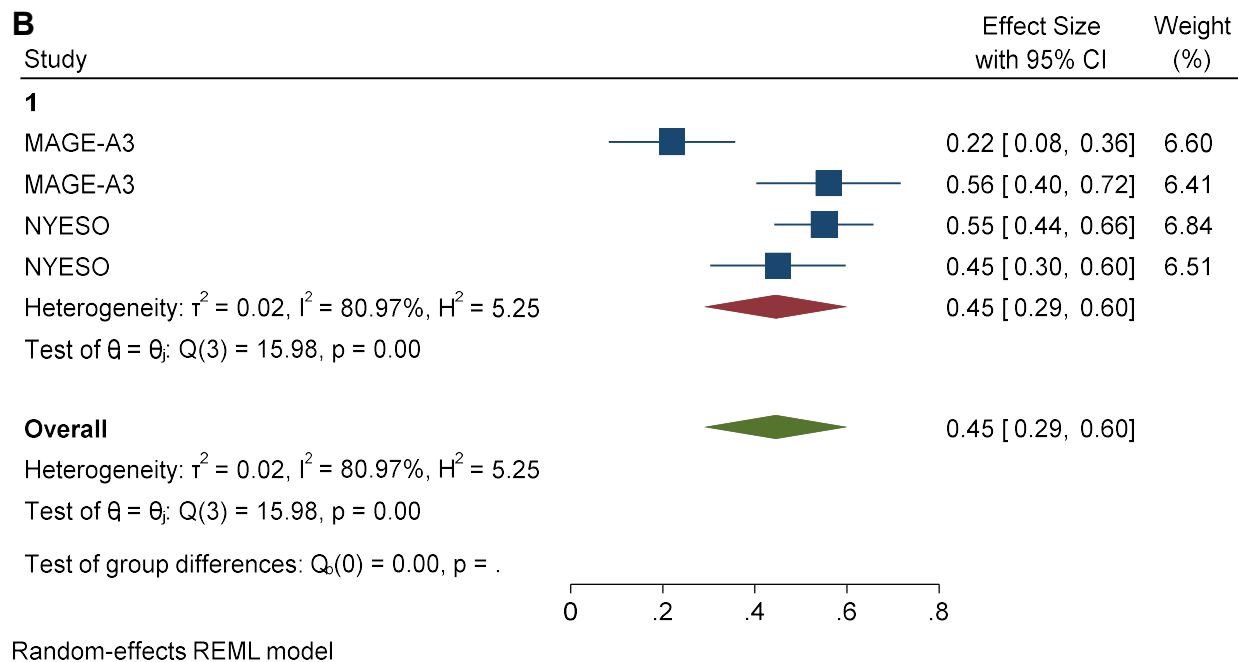

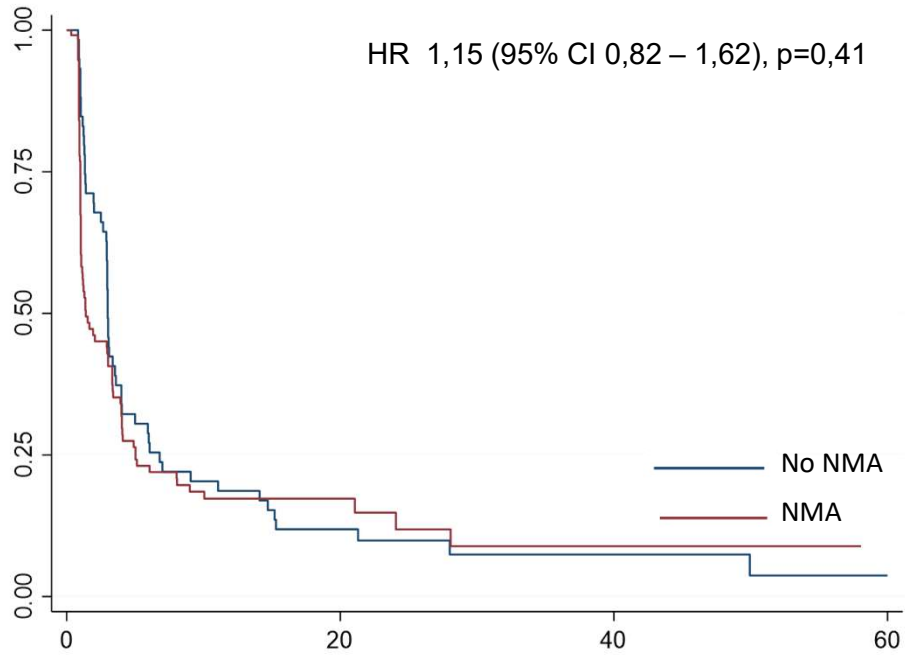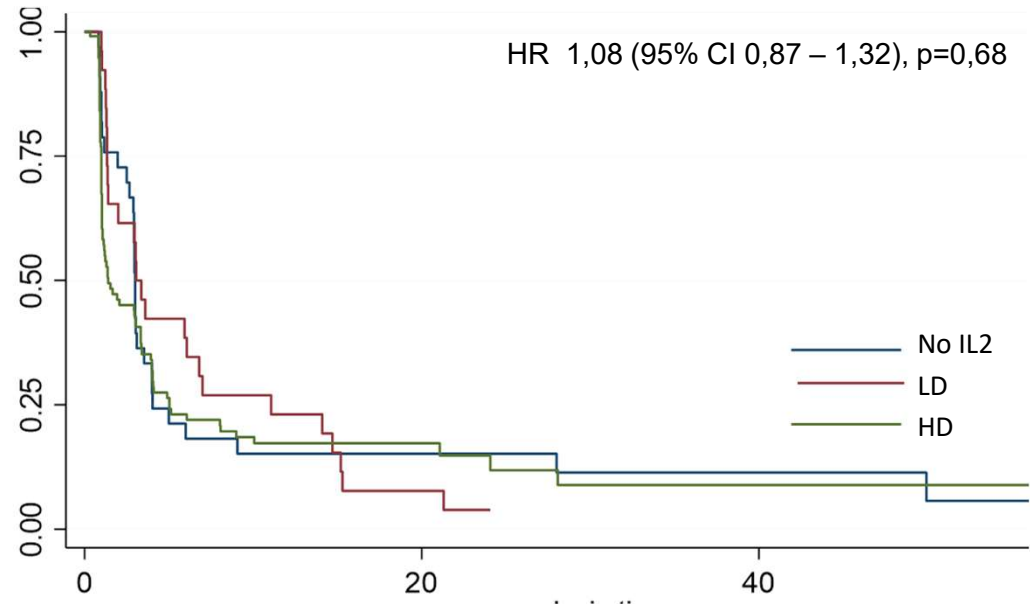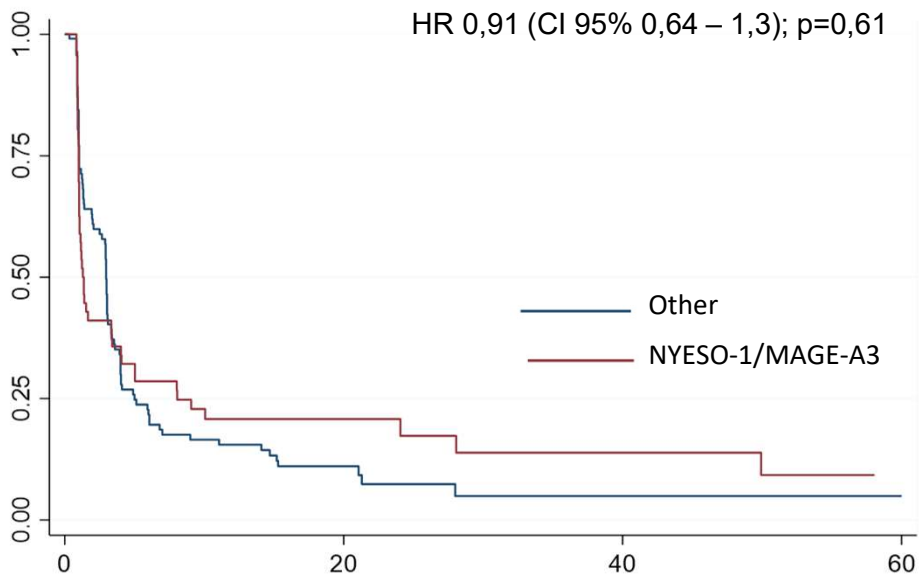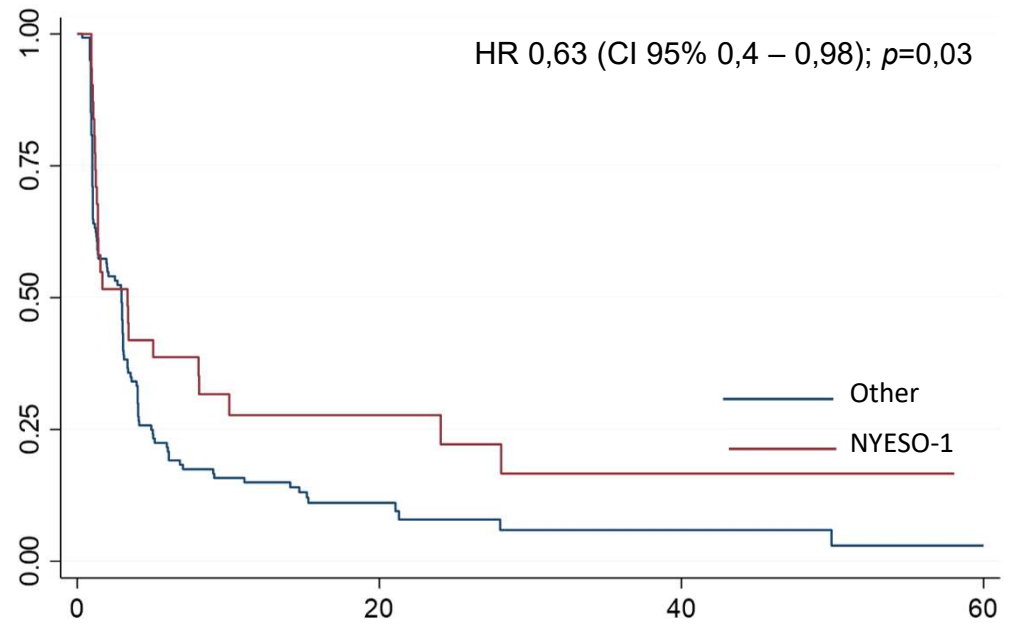

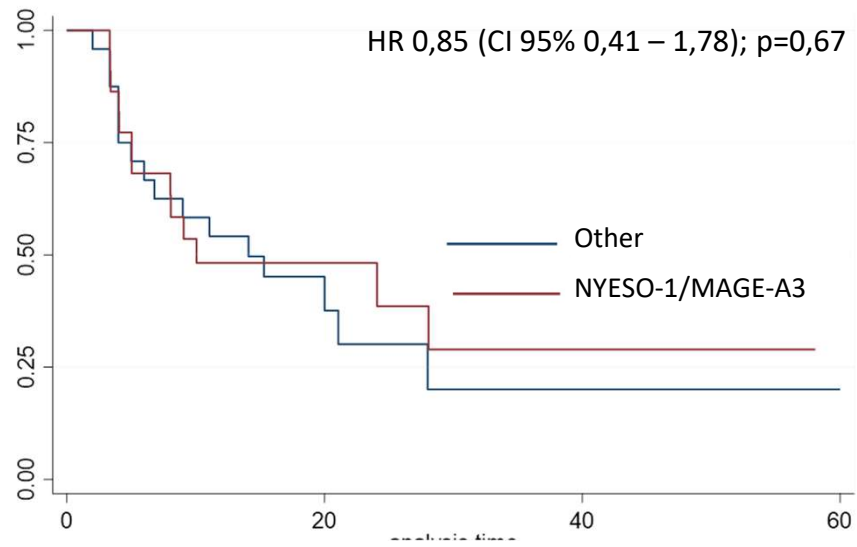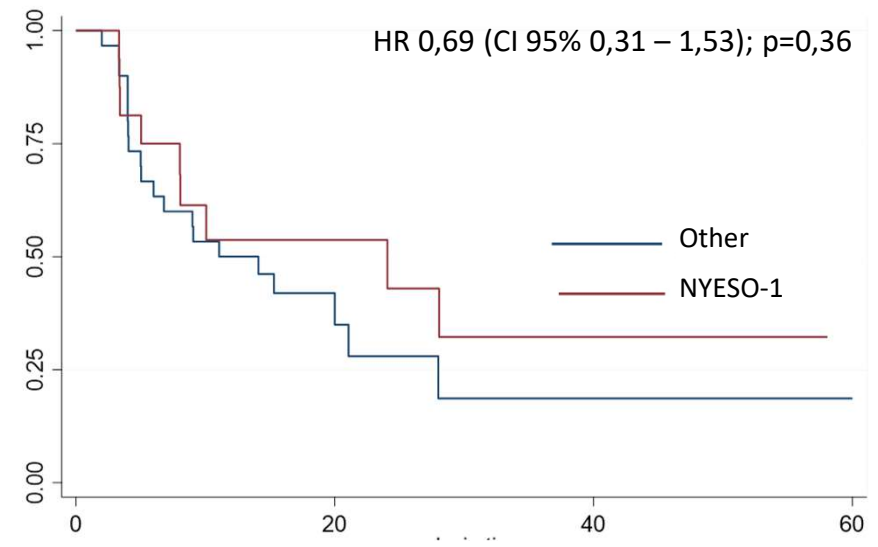

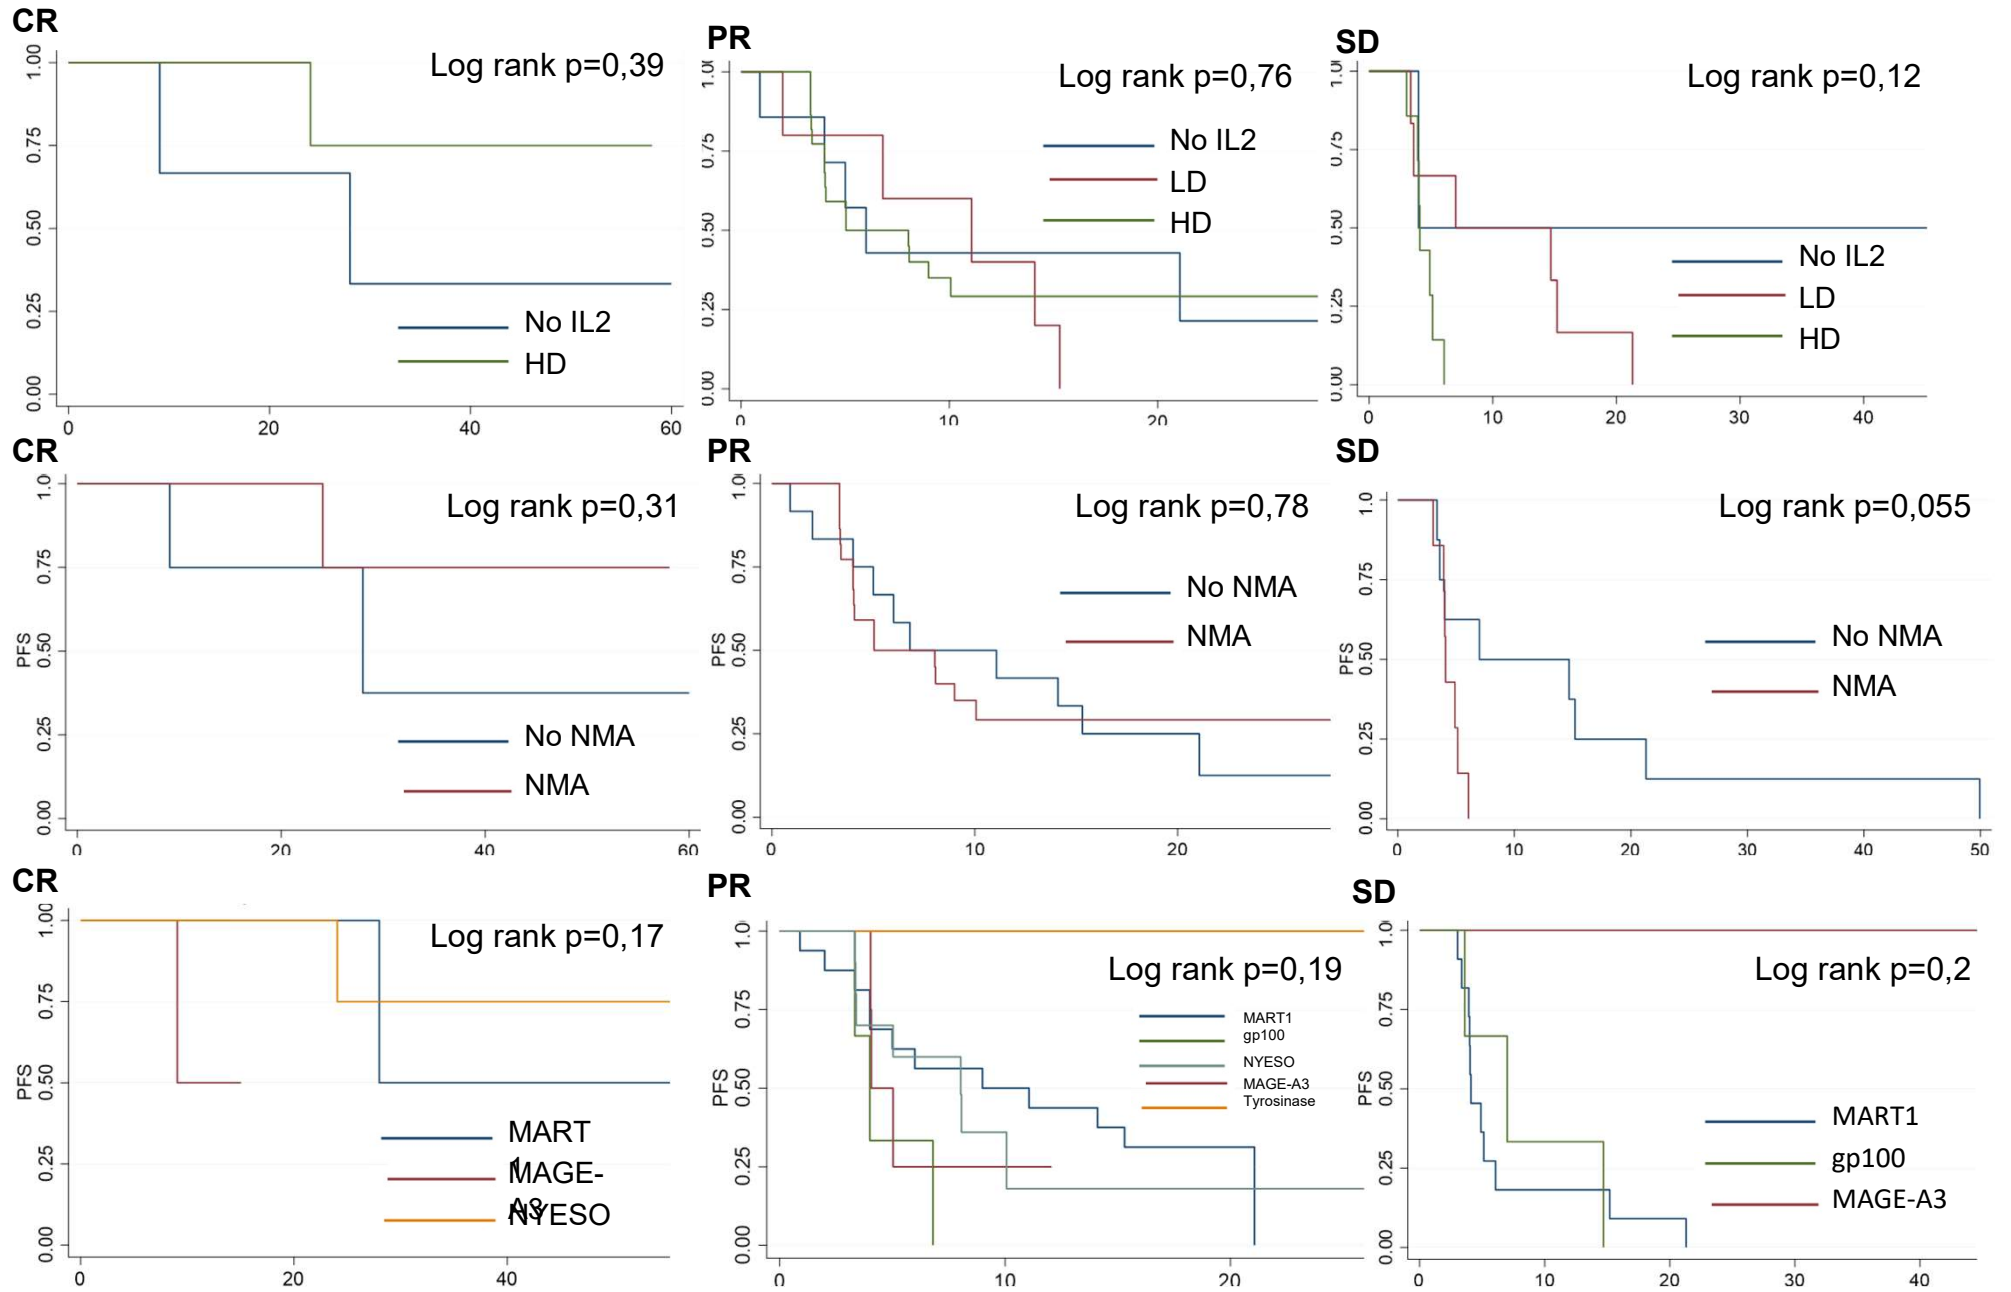

Supplement: oyad078_suppl_supplementary_material.pdf [file oyad078_suppl_supplementary_material.pdf]
